# Supplementary material for: Thymol@activated Carbon Nanohybrid for Low-Density Polyethylene-Based Active Packaging Films for Pork Fillets’ Shelf-Life Extension
Source: MDPI journal article supplement (doi:10.3390/foods12132590), 2023-07-03
Supplement: s1 [file s1]

**Table S1.** Data from thermogravimetric experiments used control release experiments of thymol from LDPE/5TO@AC film sample

| LDPE/5TO@AC sample 1_average<br>thickness 0.06mm |                  |                    | LDPE/5TO@AC sample 2_average<br>thickness 0.06mm |                  |                    | LDPE/5TO@AC sample 3_average<br>thickness 0.06mm |                  |                    |
|--------------------------------------------------|------------------|--------------------|--------------------------------------------------|------------------|--------------------|--------------------------------------------------|------------------|--------------------|
| t                                                | m/m <sub>0</sub> | 1-m/m <sub>0</sub> | t                                                | m/m <sub>0</sub> | 1-m/m <sub>0</sub> | t                                                | m/m <sub>0</sub> | 1-m/m <sub>0</sub> |
| 0.00                                             | 1.00             | 0.00               | 0.00                                             | 1.00             | 0.00               | 0.00                                             | 1.00             | 0.00               |
| 60                                               | 0.98             | 0.02               | 60                                               | 0.98             | 0.02               | 60                                               | 0.98             | 0.02               |
| 120                                              | 0.98             | 0.02               | 120                                              | 0.98             | 0.02               | 120                                              | 0.98             | 0.02               |
| 180                                              | 0.98             | 0.02               | 180                                              | 0.98             | 0.02               | 180                                              | 0.98             | 0.02               |
| 240                                              | 0.98             | 0.02               | 240                                              | 0.98             | 0.02               | 240                                              | 0.98             | 0.02               |
| 300                                              | 0.98             | 0.02               | 300                                              | 0.98             | 0.02               | 300                                              | 0.98             | 0.02               |
| 360                                              | 0.98             | 0.02               | 360                                              | 0.98             | 0.02               | 360                                              | 0.98             | 0.02               |
| 420                                              | 0.98             | 0.02               | 420                                              | 0.98             | 0.02               | 420                                              | 0.98             | 0.02               |
| 480                                              | 0.98             | 0.02               | 480                                              | 0.98             | 0.02               | 480                                              | 0.98             | 0.02               |
| 540                                              | 0.98             | 0.02               | 540                                              | 0.98             | 0.02               | 540                                              | 0.98             | 0.02               |
| 600                                              | 0.98             | 0.02               | 600                                              | 0.98             | 0.02               | 600                                              | 0.98             | 0.02               |
| 660                                              | 0.98             | 0.02               | 660                                              | 0.98             | 0.02               | 660                                              | 0.98             | 0.02               |
| 720                                              | 0.98             | 0.02               | 720                                              | 0.98             | 0.02               | 720                                              | 0.98             | 0.02               |
| 780                                              | 0.98             | 0.02               | 780                                              | 0.98             | 0.02               | 780                                              | 0.98             | 0.02               |
| 840                                              | 0.98             | 0.02               | 840                                              | 0.98             | 0.02               | 840                                              | 0.98             | 0.02               |
| 900                                              | 0.97             | 0.03               | 900                                              | 0.98             | 0.02               | 900                                              | 0.98             | 0.02               |
| 960                                              | 0.97             | 0.03               | 960                                              | 0.98             | 0.02               | 960                                              | 0.98             | 0.02               |
| 1020                                             | 0.97             | 0.03               | 1020                                             | 0.98             | 0.02               | 1020                                             | 0.98             | 0.02               |
| 1080                                             | 0.97             | 0.03               | 1080                                             | 0.98             | 0.02               | 1080                                             | 0.98             | 0.02               |
| 1140                                             | 0.97             | 0.03               | 1140                                             | 0.98             | 0.02               | 1140                                             | 0.98             | 0.02               |
| 1200                                             | 0.97             | 0.03               | 1200                                             | 0.98             | 0.02               | 1200                                             | 0.98             | 0.02               |
| 1260                                             | 0.97             | 0.03               | 1260                                             | 0.98             | 0.02               | 1260                                             | 0.98             | 0.02               |
| 1320                                             | 0.97             | 0.03               | 1320                                             | 0.98             | 0.02               | 1320                                             | 0.98             | 0.02               |
| 1380                                             | 0.97             | 0.03               | 1380                                             | 0.98             | 0.02               | 1380                                             | 0.98             | 0.02               |
| 1440                                             | 0.97             | 0.03               | 1440                                             | 0.98             | 0.02               | 1440                                             | 0.98             | 0.02               |

**Table S2.** Data from thermogravimetric experiments used for control release experiments of thymol from LDPE/10TO@AC film sample.

| LDPE/10TO@AC sample 1_average<br>thickness 0.08mm |                  |                    | LDPE/10TO@AC sample 2_average<br>thickness 0.07mm |                  |                    | LDPE/10TO@AC sample 3_average<br>thickness 0.06mm |                  |                    |
|---------------------------------------------------|------------------|--------------------|---------------------------------------------------|------------------|--------------------|---------------------------------------------------|------------------|--------------------|
| t                                                 | m/m <sub>0</sub> | 1-m/m <sub>0</sub> | t                                                 | m/m <sub>0</sub> | 1-m/m <sub>0</sub> | t                                                 | m/m <sub>0</sub> | 1-m/m <sub>0</sub> |
| 0.00                                              | 1.00             | 0.00               | 0.00                                              | 1.00             | 0.00               | 0.00                                              | 1.00             | 0.00               |
| 60                                                | 0.98             | 0.02               | 60                                                | 0.98             | 0.02               | 60                                                | 0.97             | 0.03               |
| 120                                               | 0.97             | 0.03               | 120                                               | 0.98             | 0.02               | 120                                               | 0.96             | 0.04               |
| 180                                               | 0.97             | 0.03               | 180                                               | 0.98             | 0.02               | 180                                               | 0.96             | 0.04               |
| 240                                               | 0.97             | 0.03               | 240                                               | 0.98             | 0.02               | 240                                               | 0.96             | 0.04               |
| 300                                               | 0.97             | 0.03               | 300                                               | 0.98             | 0.02               | 300                                               | 0.96             | 0.04               |
| 360                                               | 0.97             | 0.03               | 360                                               | 0.98             | 0.02               | 360                                               | 0.96             | 0.04               |
| 420                                               | 0.97             | 0.03               | 420                                               | 0.97             | 0.03               | 420                                               | 0.96             | 0.04               |
| 480                                               | 0.97             | 0.03               | 480                                               | 0.97             | 0.03               | 480                                               | 0.96             | 0.04               |
| 540                                               | 0.97             | 0.03               | 540                                               | 0.97             | 0.03               | 540                                               | 0.96             | 0.04               |
| 600                                               | 0.97             | 0.03               | 600                                               | 0.97             | 0.03               | 600                                               | 0.96             | 0.04               |
| 660                                               | 0.97             | 0.03               | 660                                               | 0.97             | 0.03               | 660                                               | 0.96             | 0.04               |
| 720                                               | 0.97             | 0.03               | 720                                               | 0.97             | 0.03               | 720                                               | 0.96             | 0.04               |
| 780                                               | 0.97             | 0.03               | 780                                               | 0.97             | 0.03               | 780                                               | 0.96             | 0.04               |
| 840                                               | 0.97             | 0.03               | 840                                               | 0.97             | 0.03               | 840                                               | 0.96             | 0.04               |
| 900                                               | 0.97             | 0.03               | 900                                               | 0.97             | 0.03               | 900                                               | 0.96             | 0.04               |
| 960                                               | 0.97             | 0.03               | 960                                               | 0.97             | 0.03               | 960                                               | 0.96             | 0.04               |
| 1020                                              | 0.97             | 0.03               | 1020                                              | 0.97             | 0.03               | 1020                                              | 0.96             | 0.04               |
| 1080                                              | 0.97             | 0.03               | 1080                                              | 0.97             | 0.03               | 1080                                              | 0.96             | 0.04               |
| 1140                                              | 0.97             | 0.03               | 1140                                              | 0.97             | 0.03               | 1140                                              | 0.96             | 0.04               |
| 1200                                              | 0.97             | 0.03               | 1200                                              | 0.97             | 0.03               | 1200                                              | 0.96             | 0.04               |
| 1260                                              | 0.97             | 0.03               | 1260                                              | 0.97             | 0.03               | 1260                                              | 0.96             | 0.04               |
| 1320                                              | 0.97             | 0.03               | 1320                                              | 0.00             | 1.00               | 1320                                              | 0.96             | 0.04               |
| 1380                                              | 0.97             | 0.03               | 1380                                              | 0.00             | 1.00               | 1380                                              | 0.96             | 0.04               |
| 1440                                              | 0.00             | 1.00               | 1440                                              | 0.00             | 1.00               | 1440                                              | 0.96             | 0.04               |

**Table S3.** Data from thermogravimetric experiments used for control release experiments of thymol from LDPE/15TO@AC film sample.

| LDPE/15TO@AC sample 1_average<br>thickness 0.10mm |                                |                                  | LDPE/15TO@AC sample 2_average<br>thickness 0.09mm |                                |                                  | LDPE/15TO@AC sample 3_average<br>thickness 0.05mm |                                |                                  |
|---------------------------------------------------|--------------------------------|----------------------------------|---------------------------------------------------|--------------------------------|----------------------------------|---------------------------------------------------|--------------------------------|----------------------------------|
| t                                                 | m <sub>t</sub> /m <sub>0</sub> | 1-m <sub>t</sub> /m <sub>0</sub> | t                                                 | m <sub>t</sub> /m <sub>0</sub> | 1-m <sub>t</sub> /m <sub>0</sub> | t                                                 | m <sub>t</sub> /m <sub>0</sub> | 1-m <sub>t</sub> /m <sub>0</sub> |
| 0.00                                              | 1.00                           | 0.00                             | 0.00                                              | 1.00                           | 0.00                             | 0.00                                              | 1.00                           | 0.00                             |
| 60                                                | 0.96                           | 0.04                             | 60                                                | 0.96                           | 0.04                             | 60                                                | 0.97                           | 0.03                             |
| 120                                               | 0.96                           | 0.04                             | 120                                               | 0.96                           | 0.04                             | 120                                               | 0.97                           | 0.03                             |
| 180                                               | 0.96                           | 0.04                             | 180                                               | 0.96                           | 0.04                             | 180                                               | 0.97                           | 0.03                             |
| 240                                               | 0.96                           | 0.04                             | 240                                               | 0.96                           | 0.04                             | 240                                               | 0.97                           | 0.03                             |
| 300                                               | 0.95                           | 0.05                             | 300                                               | 0.96                           | 0.04                             | 300                                               | 0.97                           | 0.03                             |
| 360                                               | 0.95                           | 0.05                             | 360                                               | 0.96                           | 0.04                             | 360                                               | 0.97                           | 0.03                             |
| 420                                               | 0.95                           | 0.05                             | 420                                               | 0.96                           | 0.04                             | 420                                               | 0.97                           | 0.03                             |
| 480                                               | 0.95                           | 0.05                             | 480                                               | 0.96                           | 0.04                             | 480                                               | 0.97                           | 0.03                             |
| 540                                               | 0.95                           | 0.05                             | 540                                               | 0.96                           | 0.04                             | 540                                               | 0.97                           | 0.03                             |
| 600                                               | 0.95                           | 0.05                             | 600                                               | 0.96                           | 0.04                             | 600                                               | 0.97                           | 0.03                             |
| 660                                               | 0.95                           | 0.05                             | 660                                               | 0.96                           | 0.04                             | 660                                               | 0.97                           | 0.03                             |
| 720                                               | 0.95                           | 0.05                             | 720                                               | 0.96                           | 0.04                             | 720                                               | 0.97                           | 0.03                             |
| 780                                               | 0.95                           | 0.05                             | 780                                               | 0.96                           | 0.04                             | 780                                               | 0.97                           | 0.03                             |
| 840                                               | 0.95                           | 0.05                             | 840                                               | 0.96                           | 0.04                             | 840                                               | 0.97                           | 0.03                             |
| 900                                               | 0.95                           | 0.05                             | 900                                               | 0.96                           | 0.04                             | 900                                               | 0.97                           | 0.03                             |
| 960                                               | 0.95                           | 0.05                             | 960                                               | 0.96                           | 0.04                             | 960                                               | 0.97                           | 0.03                             |
| 1020                                              | 0.95                           | 0.05                             | 1020                                              | 0.96                           | 0.04                             | 1020                                              | 0.97                           | 0.03                             |
| 1080                                              | 0.95                           | 0.05                             | 1080                                              | 0.96                           | 0.04                             | 1080                                              | 0.97                           | 0.03                             |
| 1140                                              | 0.95                           | 0.05                             | 1140                                              | 0.96                           | 0.04                             | 1140                                              | 0.97                           | 0.03                             |
| 1200                                              | 0.95                           | 0.05                             | 1200                                              | 0.96                           | 0.04                             | 1200                                              | 0.97                           | 0.03                             |
| 1260                                              | 0.95                           | 0.05                             | 1260                                              | 0.96                           | 0.04                             | 1260                                              | 0.97                           | 0.03                             |
| 1320                                              | 0.95                           | 0.05                             | 1320                                              | 0.96                           | 0.04                             | 1320                                              | 0.97                           | 0.03                             |
| 1380                                              | 0.95                           | 0.05                             | 1380                                              | 0.96                           | 0.04                             | 1380                                              | 0.97                           | 0.03                             |
| 1440                                              | 0.94                           | 0.06                             | 1440                                              | 0.96                           | 0.04                             | 1440                                              | 0.97                           | 0.03                             |
| 1500                                              | 0.94                           | 0.06                             | 1500                                              | 0.00                           | 1.00                             | 1500                                              | 0.96                           | 0.04                             |
| 1560                                              | 0.94                           | 0.06                             | 1560                                              | 0.00                           | 1.00                             | 1560                                              | 0.96                           | 0.04                             |
| 1620                                              | 0.94                           | 0.06                             | 1620                                              | 0.00                           | 1.00                             | 1620                                              | 0.96                           | 0.04                             |
| 1680                                              | 0.94                           | 0.06                             | 1680                                              | 0.00                           | 1.00                             | 1680                                              | 0.96                           | 0.04                             |
| 1740                                              | 0.94                           | 0.06                             | 1740                                              | 0.00                           | 1.00                             | 1740                                              | 0.96                           | 0.04                             |
| 1800                                              | 0.94                           | 0.06                             | 1800                                              | 0.00                           | 1.00                             | 1800                                              | 0.96                           | 0.04                             |

**Table S4.** Multiple comparison tests of TBARS values of pork meat during storage with respect to packaging treatments

|                    |            | Multiple Comparisons |        |          |        |                         |        |             |
|--------------------|------------|----------------------|--------|----------|--------|-------------------------|--------|-------------|
|                    |            | Mean Difference      |        |          | Sig.   | 95% Confidence Interval |        |             |
| Dependent Variable |            | (I) TR               | (J) TR | (I-J)    |        | Std. Error              |        | Lower Bound |
| DAY0               | Tukey HSD  | 1,00                 | 2,00   | ,22880*  | ,00562 | ,000                    | ,2116  | ,2460       |
|                    |            |                      | 3,00   | ,22880*  | ,00562 | ,000                    | ,2116  | ,2460       |
|                    |            | 2,00                 | 1,00   | -,22880* | ,00562 | ,000                    | -,2460 | -,2116      |
|                    |            |                      | 3,00   | ,00000   | ,00562 | 1,000                   | -,0172 | ,0172       |
|                    |            | 3,00                 | 1,00   | -,22880* | ,00562 | ,000                    | -,2460 | -,2116      |
|                    |            |                      | 2,00   | ,00000   | ,00562 | 1,000                   | -,0172 | ,0172       |
|                    | LSD        | 1,00                 | 2,00   | ,22880*  | ,00562 | ,000                    | ,2151  | ,2425       |
|                    |            |                      | 3,00   | ,22880*  | ,00562 | ,000                    | ,2151  | ,2425       |
|                    |            | 2,00                 | 1,00   | -,22880* | ,00562 | ,000                    | -,2425 | -,2151      |
|                    |            |                      | 3,00   | ,00000   | ,00562 | 1,000                   | -,0137 | ,0137       |
|                    |            | 3,00                 | 1,00   | -,22880* | ,00562 | ,000                    | -,2425 | -,2151      |
|                    |            |                      | 2,00   | ,00000   | ,00562 | 1,000                   | -,0137 | ,0137       |
|                    | Bonferroni | 1,00                 | 2,00   | ,22880*  | ,00562 | ,000                    | ,2103  | ,2473       |
|                    |            |                      | 3,00   | ,22880*  | ,00562 | ,000                    | ,2103  | ,2473       |
|                    |            | 2,00                 | 1,00   | -,22880* | ,00562 | ,000                    | -,2473 | -,2103      |
|                    |            |                      | 3,00   | ,00000   | ,00562 | 1,000                   | -,0185 | ,0185       |
|                    |            | 3,00                 | 1,00   | -,22880* | ,00562 | ,000                    | -,2473 | -,2103      |
|                    |            |                      | 2,00   | ,00000   | ,00562 | 1,000                   | -,0185 | ,0185       |
| DAY2               | Tukey HSD  | 1,00                 | 2,00   | ,04420*  | ,01082 | ,015                    | ,0110  | ,0774       |
|                    |            |                      | 3,00   | ,09620*  | ,01082 | ,000                    | ,0630  | ,1294       |
|                    |            | 2,00                 | 1,00   | -,04420* | ,01082 | ,015                    | -,0774 | -,0110      |
|                    |            |                      | 3,00   | ,05200*  | ,01082 | ,007                    | ,0188  | ,0852       |
|                    |            | 3,00                 | 1,00   | -,09620* | ,01082 | ,000                    | -,1294 | -,0630      |
|                    |            |                      | 2,00   | -,05200* | ,01082 | ,007                    | -,0852 | -,0188      |
|                    | LSD        | 1,00                 | 2,00   | ,04420*  | ,01082 | ,006                    | ,0177  | ,0707       |
|                    |            |                      | 3,00   | ,09620*  | ,01082 | ,000                    | ,0697  | ,1227       |
|                    |            | 2,00                 | 1,00   | -,04420* | ,01082 | ,006                    | -,0707 | -,0177      |
|                    |            |                      | 3,00   | ,05200*  | ,01082 | ,003                    | ,0255  | ,0785       |
|                    |            | 3,00                 | 1,00   | -,09620* | ,01082 | ,000                    | -,1227 | -,0697      |
|                    |            |                      | 2,00   | -,05200* | ,01082 | ,003                    | -,0785 | -,0255      |
|                    | Bonferroni | 1,00                 | 2,00   | ,04420*  | ,01082 | ,019                    | ,0086  | ,0798       |
|                    |            |                      | 3,00   | ,09620*  | ,01082 | ,000                    | ,0606  | ,1318       |
|                    |            | 2,00                 | 1,00   | -,04420* | ,01082 | ,019                    | -,0798 | -,0086      |
|                    |            |                      | 3,00   | ,05200*  | ,01082 | ,009                    | ,0164  | ,0876       |
|                    |            | 3,00                 | 1,00   | -,09620* | ,01082 | ,000                    | -,1318 | -,0606      |
|                    |            |                      | 2,00   | -,05200* | ,01082 | ,009                    | -,0876 | -,0164      |
| DAY4               | Tukey HSD  | 1,00                 | 2,00   | ,05460*  | ,01163 | ,008                    | ,0189  | ,0903       |
|                    |            |                      | 3,00   | ,13000*  | ,01163 | ,000                    | ,0943  | ,1657       |
|                    |            | 2,00                 | 1,00   | -,05460* | ,01163 | ,008                    | -,0903 | -,0189      |
|                    |            |                      | 3,00   | ,07540*  | ,01163 | ,002                    | ,0397  | ,1111       |
|                    |            | 3,00                 | 1,00   | -,13000* | ,01163 | ,000                    | -,1657 | -,0943      |
|                    |            |                      | 2,00   | -,07540* | ,01163 | ,002                    | -,1111 | -,0397      |
|                    | LSD        | 1,00                 | 2,00   | ,05460*  | ,01163 | ,003                    | ,0261  | ,0831       |
|                    |            |                      | 3,00   | ,13000*  | ,01163 | ,000                    | ,1015  | ,1585       |

|      |            |      |      |          |        |      |        |        |
|------|------------|------|------|----------|--------|------|--------|--------|
|      | Bonferroni | 2,00 | 1,00 | -,05460* | ,01163 | ,003 | -,0831 | -,0261 |
|      |            |      | 3,00 | ,07540*  | ,01163 | ,001 | ,0469  | ,1039  |
|      |            | 3,00 | 1,00 | -,13000* | ,01163 | ,000 | -,1585 | -,1015 |
|      |            |      | 2,00 | -,07540* | ,01163 | ,001 | -,1039 | -,0469 |
|      |            | 1,00 | 2,00 | ,05460*  | ,01163 | ,010 | ,0164  | ,0928  |
|      |            |      | 3,00 | ,13000*  | ,01163 | ,000 | ,0918  | ,1682  |
|      |            | 2,00 | 1,00 | -,05460* | ,01163 | ,010 | -,0928 | -,0164 |
|      |            |      | 3,00 | ,07540*  | ,01163 | ,002 | ,0372  | ,1136  |
|      |            | 3,00 | 1,00 | -,13000* | ,01163 | ,000 | -,1682 | -,0918 |
|      |            |      | 2,00 | -,07540* | ,01163 | ,002 | -,1136 | -,0372 |
| DAY6 | Tukey HSD  | 1,00 | 2,00 | ,10140*  | ,01516 | ,001 | ,0549  | ,1479  |
|      |            |      | 3,00 | ,19500*  | ,01516 | ,000 | ,1485  | ,2415  |
|      |            | 2,00 | 1,00 | -,10140* | ,01516 | ,001 | -,1479 | -,0549 |
|      |            |      | 3,00 | ,09360*  | ,01516 | ,002 | ,0471  | ,1401  |
|      |            | 3,00 | 1,00 | -,19500* | ,01516 | ,000 | -,2415 | -,1485 |
|      |            |      | 2,00 | -,09360* | ,01516 | ,002 | -,1401 | -,0471 |
|      | LSD        | 1,00 | 2,00 | ,10140*  | ,01516 | ,001 | ,0643  | ,1385  |
|      |            |      | 3,00 | ,19500*  | ,01516 | ,000 | ,1579  | ,2321  |
|      |            | 2,00 | 1,00 | -,10140* | ,01516 | ,001 | -,1385 | -,0643 |
|      |            |      | 3,00 | ,09360*  | ,01516 | ,001 | ,0565  | ,1307  |
|      |            | 3,00 | 1,00 | -,19500* | ,01516 | ,000 | -,2321 | -,1579 |
|      |            |      | 2,00 | -,09360* | ,01516 | ,001 | -,1307 | -,0565 |
|      | Bonferroni | 1,00 | 2,00 | ,10140*  | ,01516 | ,002 | ,0516  | ,1512  |
|      |            |      | 3,00 | ,19500*  | ,01516 | ,000 | ,1452  | ,2448  |
|      |            | 2,00 | 1,00 | -,10140* | ,01516 | ,002 | -,1512 | -,0516 |
|      |            |      | 3,00 | ,09360*  | ,01516 | ,002 | ,0438  | ,1434  |
|      |            | 3,00 | 1,00 | -,19500* | ,01516 | ,000 | -,2448 | -,1452 |
|      |            |      | 2,00 | -,09360* | ,01516 | ,002 | -,1434 | -,0438 |
| DAY8 | Tukey HSD  | 1,00 | 2,00 | ,15340*  | ,01712 | ,000 | ,1009  | ,2059  |
|      |            |      | 3,00 | ,22620*  | ,01712 | ,000 | ,1737  | ,2787  |
|      |            | 2,00 | 1,00 | -,15340* | ,01712 | ,000 | -,2059 | -,1009 |
|      |            |      | 3,00 | ,07280*  | ,01712 | ,013 | ,0203  | ,1253  |
|      |            | 3,00 | 1,00 | -,22620* | ,01712 | ,000 | -,2787 | -,1737 |
|      |            |      | 2,00 | -,07280* | ,01712 | ,013 | -,1253 | -,0203 |
|      | LSD        | 1,00 | 2,00 | ,15340*  | ,01712 | ,000 | ,1115  | ,1953  |
|      |            |      | 3,00 | ,22620*  | ,01712 | ,000 | ,1843  | ,2681  |
|      |            | 2,00 | 1,00 | -,15340* | ,01712 | ,000 | -,1953 | -,1115 |
|      |            |      | 3,00 | ,07280*  | ,01712 | ,005 | ,0309  | ,1147  |
|      |            | 3,00 | 1,00 | -,22620* | ,01712 | ,000 | -,2681 | -,1843 |
|      |            |      | 2,00 | -,07280* | ,01712 | ,005 | -,1147 | -,0309 |
|      | Bonferroni | 1,00 | 2,00 | ,15340*  | ,01712 | ,000 | ,0971  | ,2097  |
|      |            |      | 3,00 | ,22620*  | ,01712 | ,000 | ,1699  | ,2825  |
|      |            | 2,00 | 1,00 | -,15340* | ,01712 | ,000 | -,2097 | -,0971 |
|      |            |      | 3,00 | ,07280*  | ,01712 | ,016 | ,0165  | ,1291  |
|      |            | 3,00 | 1,00 | -,22620* | ,01712 | ,000 | -,2825 | -,1699 |

|       |            |      |      |          |          |        |        |        |
|-------|------------|------|------|----------|----------|--------|--------|--------|
| DAY10 | Tukey HSD  | 1,00 | 2,00 | -,07280* | ,01712   | ,016   | -,1291 | -,0165 |
|       |            |      | 2,00 | ,11440*  | ,02316   | ,006   | ,0433  | ,1855  |
|       |            |      | 3,00 | ,26780*  | ,02316   | ,000   | ,1967  | ,3389  |
|       |            | 2,00 | 1,00 | -,11440* | ,02316   | ,006   | -,1855 | -,0433 |
|       |            |      | 3,00 | ,15340*  | ,02316   | ,001   | ,0823  | ,2245  |
|       |            |      | 3,00 | 1,00     | -,26780* | ,02316 | ,000   | -,3389 |
|       | LSD        | 1,00 | 2,00 | -,15340* | ,02316   | ,001   | -,2245 | -,0823 |
|       |            |      | 3,00 | ,11440*  | ,02316   | ,003   | ,0577  | ,1711  |
|       |            |      | 3,00 | ,26780*  | ,02316   | ,000   | ,2111  | ,3245  |
|       |            | 2,00 | 1,00 | -,11440* | ,02316   | ,003   | -,1711 | -,0577 |
|       |            |      | 3,00 | ,15340*  | ,02316   | ,001   | ,0967  | ,2101  |
|       |            |      | 3,00 | 1,00     | -,26780* | ,02316 | ,000   | -,3245 |
|       | Bonferroni | 1,00 | 2,00 | -,15340* | ,02316   | ,001   | -,2101 | -,0967 |
|       |            |      | 2,00 | ,11440*  | ,02316   | ,008   | ,0383  | ,1905  |
|       |            |      | 3,00 | ,26780*  | ,02316   | ,000   | ,1917  | ,3439  |
|       |            | 2,00 | 1,00 | -,11440* | ,02316   | ,008   | -,1905 | -,0383 |
|       |            |      | 3,00 | ,15340*  | ,02316   | ,002   | ,0773  | ,2295  |
|       |            |      | 3,00 | 1,00     | -,26780* | ,02316 | ,000   | -,3439 |
| DAY12 | Tukey HSD  | 1,00 | 2,00 | -,15340* | ,02316   | ,002   | -,2295 | -,0773 |
|       |            |      | 2,00 | ,11440*  | ,02316   | ,008   | ,0383  | ,1905  |
|       |            |      | 3,00 | ,26780*  | ,02316   | ,000   | ,1917  | ,3439  |
|       |            | 2,00 | 1,00 | -,11440* | ,02316   | ,008   | -,1905 | -,0383 |
|       |            |      | 3,00 | ,15340*  | ,02316   | ,002   | ,0773  | ,2295  |
|       |            |      | 3,00 | 1,00     | -,26780* | ,02316 | ,000   | -,3439 |
|       | LSD        | 1,00 | 2,00 | -,15340* | ,02316   | ,002   | -,2295 | -,0773 |
|       |            |      | 2,00 | ,11440*  | ,02316   | ,008   | ,0383  | ,1905  |
|       |            |      | 3,00 | ,26780*  | ,02316   | ,000   | ,1917  | ,3439  |
|       |            | 2,00 | 1,00 | -,11440* | ,02316   | ,008   | -,1905 | -,0383 |
|       |            |      | 3,00 | ,15340*  | ,02316   | ,002   | ,0773  | ,2295  |
|       |            |      | 3,00 | 1,00     | -,26780* | ,02316 | ,000   | -,3439 |
|       | Bonferroni | 1,00 | 2,00 | -,15340* | ,02316   | ,002   | -,2295 | -,0773 |
|       |            |      | 2,00 | ,11440*  | ,02316   | ,008   | ,0383  | ,1905  |
|       |            |      | 3,00 | ,26780*  | ,02316   | ,000   | ,1917  | ,3439  |
|       |            | 2,00 | 1,00 | -,11440* | ,02316   | ,008   | -,1905 | -,0383 |
|       |            |      | 3,00 | ,15340*  | ,02316   | ,002   | ,0773  | ,2295  |
|       |            |      | 3,00 | 1,00     | -,26780* | ,02316 | ,000   | -,3439 |
| DAY12 | Tukey HSD  | 1,00 | 2,00 | -,15340* | ,02316   | ,002   | -,2295 | -,0773 |
|       |            |      | 2,00 | ,11440*  | ,02316   | ,008   | ,0383  | ,1905  |
|       |            |      | 3,00 | ,26780*  | ,02316   | ,000   | ,1917  | ,3439  |
|       |            | 2,00 | 1,00 | -,11440* | ,02316   | ,008   | -,1905 | -,0383 |
|       |            |      | 3,00 | ,15340*  | ,02316   | ,002   | ,0773  | ,2295  |
|       |            |      | 3,00 | 1,00     | -,26780* | ,02316 | ,000   | -,3439 |
|       | LSD        | 1,00 | 2,00 | -,15340* | ,02316   | ,002   | -,2295 | -,0773 |
|       |            |      | 2,00 | ,11440*  | ,02316   | ,008   | ,0383  | ,1905  |
|       |            |      | 3,00 | ,26780*  | ,02316   | ,000   | ,1917  | ,3439  |
|       |            | 2,00 | 1,00 | -,11440* | ,02316   | ,008   | -,1905 | -,0383 |
|       |            |      | 3,00 | ,15340*  | ,02316   | ,002   | ,0773  | ,2295  |
|       |            |      | 3,00 | 1,00     | -,26780* | ,02316 | ,000   | -,3439 |
|       | Bonferroni | 1,00 | 2,00 | -,15340* | ,02316   | ,002   | -,2295 | -,0773 |
|       |            |      | 2,00 | ,11440*  | ,02316   | ,008   | ,0383  | ,1905  |
|       |            |      | 3,00 | ,26780*  | ,02316   | ,000   | ,1917  | ,3439  |
|       |            | 2,00 | 1,00 | -,11440* | ,02316   | ,008   | -,1905 | -,0383 |
|       |            |      | 3,00 | ,15340*  | ,02316   | ,002   | ,0773  | ,2295  |
|       |            |      | 3,00 | 1,00     | -,26780* | ,02316 | ,000   | -,3439 |

\*. The mean difference is significant at the 0.05 level. TR: Packaging treatment, 1:LDPE, 2:LDPE-AC, 3:LDPE-AC-TO

**Table S5.** Multiple comparison tests of heme iron values of pork meat during storage with respect to packaging treatment

| Dependent Variable |           | Multiple Comparisons |      |           |        |                       |            |         |                         |             |
|--------------------|-----------|----------------------|------|-----------|--------|-----------------------|------------|---------|-------------------------|-------------|
|                    |           | (I) TR               |      | (J) TR    |        | Mean Difference (I-J) | Std. Error | Sig.    | 95% Confidence Interval |             |
|                    |           |                      |      |           |        |                       |            |         | Lower Bound             | Upper Bound |
| DAY0               | Tukey HSD | 1.00                 | 2.00 | 10.17593* | .05885 | .000                  | 9.9953     | 10.3565 |                         |             |

|      |            |      |      |            |            |        |          |          |
|------|------------|------|------|------------|------------|--------|----------|----------|
|      |            |      | 3,00 | 10,17593*  | ,05885     | ,000   | 9,9953   | 10,3565  |
|      |            |      | 2,00 | 1,00       | -10,17593* | ,05885 | ,000     | -10,3565 |
|      |            |      | 3,00 |            | ,00000     | ,05885 | 1,000    | -,1806   |
|      |            | 3,00 | 1,00 | -10,17593* | ,05885     | ,000   | -10,3565 | -9,9953  |
|      |            |      | 2,00 |            | ,00000     | ,05885 | 1,000    | -,1806   |
|      |            | LSD  | 1,00 | 2,00       | 10,17593*  | ,05885 | ,000     | 10,0319  |
|      |            |      |      | 3,00       | 10,17593*  | ,05885 | ,000     | 10,0319  |
|      |            |      | 2,00 | 1,00       | -10,17593* | ,05885 | ,000     | -10,3199 |
|      |            |      |      | 3,00       | ,00000     | ,05885 | 1,000    | -,1440   |
|      |            |      | 3,00 | 1,00       | -10,17593* | ,05885 | ,000     | -10,3199 |
|      |            |      |      | 2,00       | ,00000     | ,05885 | 1,000    | -,1440   |
|      | Bonferroni | 1,00 | 2,00 | 10,17593*  | ,05885     | ,000   | 9,9824   | 10,3694  |
|      |            |      |      | 3,00       | 10,17593*  | ,05885 | ,000     | 9,9824   |
|      |            | 2,00 | 1,00 | -10,17593* | ,05885     | ,000   | -10,3694 | -9,9824  |
|      |            |      |      | 3,00       | ,00000     | ,05885 | 1,000    | -,1935   |
|      |            | 3,00 | 1,00 | -10,17593* | ,05885     | ,000   | -10,3694 | -9,9824  |
|      |            |      |      | 2,00       | ,00000     | ,05885 | 1,000    | -,1935   |
| DAY2 | Tukey HSD  | 1,00 | 2,00 | -,95962*   | ,09234     | ,000   | -1,2429  | -,6763   |
|      |            |      |      | 3,00       | -1,65934*  | ,09234 | ,000     | -1,9427  |
|      |            | 2,00 | 1,00 | ,95962*    | ,09234     | ,000   | ,6763    | 1,2429   |
|      |            |      |      | 3,00       | -,69972*   | ,09234 | ,001     | -,9830   |
|      |            | 3,00 | 1,00 | 1,65934*   | ,09234     | ,000   | 1,3760   | 1,9427   |
|      |            |      |      | 2,00       | ,69972*    | ,09234 | ,001     | ,4164    |
|      | LSD        | 1,00 | 2,00 | -,95962*   | ,09234     | ,000   | -1,1856  | -,7337   |
|      |            |      |      | 3,00       | -1,65934*  | ,09234 | ,000     | -1,8853  |
|      |            | 2,00 | 1,00 | ,95962*    | ,09234     | ,000   | ,7337    | 1,1856   |
|      |            |      |      | 3,00       | -,69972*   | ,09234 | ,000     | -,9257   |
|      |            | 3,00 | 1,00 | 1,65934*   | ,09234     | ,000   | 1,4334   | 1,8853   |
|      |            |      |      | 2,00       | ,69972*    | ,09234 | ,000     | ,4738    |
|      | Bonferroni | 1,00 | 2,00 | -,95962*   | ,09234     | ,000   | -1,2632  | -,6561   |
|      |            |      |      | 3,00       | -1,65934*  | ,09234 | ,000     | -1,9629  |
|      |            | 2,00 | 1,00 | ,95962*    | ,09234     | ,000   | ,6561    | 1,2632   |
|      |            |      |      | 3,00       | -,69972*   | ,09234 | ,001     | -1,0033  |
|      |            | 3,00 | 1,00 | 1,65934*   | ,09234     | ,000   | 1,3558   | 1,9629   |
|      |            |      |      | 2,00       | ,69972*    | ,09234 | ,001     | ,3962    |
| DAY4 | Tukey HSD  | 1,00 | 2,00 | -,63974*   | ,09234     | ,001   | -,9231   | -,3564   |
|      |            |      |      | 3,00       | -1,75930*  | ,09234 | ,000     | -2,0426  |
|      |            | 2,00 | 1,00 | ,63974*    | ,09234     | ,001   | ,3564    | ,9231    |
|      |            |      |      | 3,00       | -1,11955*  | ,09234 | ,000     | -1,4029  |
|      |            | 3,00 | 1,00 | 1,75930*   | ,09234     | ,000   | 1,4760   | 2,0426   |
|      |            |      |      | 2,00       | 1,11955*   | ,09234 | ,000     | ,8362    |
|      | LSD        | 1,00 | 2,00 | -,63974*   | ,09234     | ,000   | -,8657   | -,4138   |
|      |            |      |      | 3,00       | -1,75930*  | ,09234 | ,000     | -1,9852  |
|      |            | 2,00 | 1,00 | ,63974*    | ,09234     | ,000   | ,4138    | ,8657    |
|      |            |      |      | 3,00       | -1,11955*  | ,09234 | ,000     | -1,3455  |



|       |            |      |      |           |        |      |         |         |
|-------|------------|------|------|-----------|--------|------|---------|---------|
|       | Bonferroni | 3,00 | 1,00 | 1,75930*  | ,09234 | ,000 | 1,5334  | 1,9852  |
|       |            |      | 2,00 | 1,11955*  | ,09234 | ,000 | ,8936   | 1,3455  |
|       |            | 1,00 | 2,00 | -,63974*  | ,09234 | ,001 | -,9433  | -,3362  |
|       |            |      | 3,00 | -1,75930* | ,09234 | ,000 | -2,0629 | -1,4557 |
|       |            | 2,00 | 1,00 | ,63974*   | ,09234 | ,001 | ,3362   | ,9433   |
|       |            |      | 3,00 | -1,11955* | ,09234 | ,000 | -1,4231 | -,8160  |
|       |            | 3,00 | 1,00 | 1,75930*  | ,09234 | ,000 | 1,4557  | 2,0629  |
|       |            |      | 2,00 | 1,11955*  | ,09234 | ,000 | ,8160   | 1,4231  |
| DAY6  | Tukey HSD  | 1,00 | 2,00 | -,59976*  | ,16727 | ,027 | -1,1130 | -,0865  |
|       |            |      | 3,00 | -2,27909* | ,16727 | ,000 | -2,7923 | -1,7659 |
|       |            | 2,00 | 1,00 | ,59976*   | ,16727 | ,027 | ,0865   | 1,1130  |
|       |            |      | 3,00 | -1,67933* | ,16727 | ,000 | -2,1925 | -1,1661 |
|       |            | 3,00 | 1,00 | 2,27909*  | ,16727 | ,000 | 1,7659  | 2,7923  |
|       |            |      | 2,00 | 1,67933*  | ,16727 | ,000 | 1,1661  | 2,1925  |
|       | LSD        | 1,00 | 2,00 | -,59976*  | ,16727 | ,012 | -1,0090 | -,1905  |
|       |            |      | 3,00 | -2,27909* | ,16727 | ,000 | -2,6884 | -1,8698 |
|       |            | 2,00 | 1,00 | ,59976*   | ,16727 | ,012 | ,1905   | 1,0090  |
|       |            |      | 3,00 | -1,67933* | ,16727 | ,000 | -2,0886 | -1,2700 |
|       |            | 3,00 | 1,00 | 2,27909*  | ,16727 | ,000 | 1,8698  | 2,6884  |
|       |            |      | 2,00 | 1,67933*  | ,16727 | ,000 | 1,2700  | 2,0886  |
|       | Bonferroni | 1,00 | 2,00 | -,59976*  | ,16727 | ,035 | -1,1496 | -,0499  |
|       |            |      | 3,00 | -2,27909* | ,16727 | ,000 | -2,8290 | -1,7292 |
|       |            | 2,00 | 1,00 | ,59976*   | ,16727 | ,035 | ,0499   | 1,1496  |
|       |            |      | 3,00 | -1,67933* | ,16727 | ,000 | -2,2292 | -1,1295 |
|       |            | 3,00 | 1,00 | 2,27909*  | ,16727 | ,000 | 1,7292  | 2,8290  |
|       |            |      | 2,00 | 1,67933*  | ,16727 | ,000 | 1,1295  | 2,2292  |
| DAY8  | Tukey HSD  | 1,00 | 2,00 | -,59976*  | ,13559 | ,011 | -1,0158 | -,1837  |
|       |            |      | 3,00 | -2,15914* | ,13559 | ,000 | -2,5752 | -1,7431 |
|       |            | 2,00 | 1,00 | ,59976*   | ,13559 | ,011 | ,1837   | 1,0158  |
|       |            |      | 3,00 | -1,55938* | ,13559 | ,000 | -1,9754 | -1,1433 |
|       |            | 3,00 | 1,00 | 2,15914*  | ,13559 | ,000 | 1,7431  | 2,5752  |
|       |            |      | 2,00 | 1,55938*  | ,13559 | ,000 | 1,1433  | 1,9754  |
|       | LSD        | 1,00 | 2,00 | -,59976*  | ,13559 | ,004 | -,9315  | -,2680  |
|       |            |      | 3,00 | -2,15914* | ,13559 | ,000 | -2,4909 | -1,8274 |
|       |            | 2,00 | 1,00 | ,59976*   | ,13559 | ,004 | ,2680   | ,9315   |
|       |            |      | 3,00 | -1,55938* | ,13559 | ,000 | -1,8912 | -1,2276 |
|       |            | 3,00 | 1,00 | 2,15914*  | ,13559 | ,000 | 1,8274  | 2,4909  |
|       |            |      | 2,00 | 1,55938*  | ,13559 | ,000 | 1,2276  | 1,8912  |
|       | Bonferroni | 1,00 | 2,00 | -,59976*  | ,13559 | ,013 | -1,0455 | -,1540  |
|       |            |      | 3,00 | -2,15914* | ,13559 | ,000 | -2,6049 | -1,7134 |
|       |            | 2,00 | 1,00 | ,59976*   | ,13559 | ,013 | ,1540   | 1,0455  |
|       |            |      | 3,00 | -1,55938* | ,13559 | ,000 | -2,0051 | -1,1136 |
|       |            | 3,00 | 1,00 | 2,15914*  | ,13559 | ,000 | 1,7134  | 2,6049  |
|       |            |      | 2,00 | 1,55938*  | ,13559 | ,000 | 1,1136  | 2,0051  |
| DAY10 | Tukey HSD  | 1,00 | 2,00 | -,25990   | ,17042 | ,345 | -,7828  | ,2630   |

|       |            |      |      |           |        |      |         |         |
|-------|------------|------|------|-----------|--------|------|---------|---------|
|       | LSD        | 2,00 | 3,00 | -1,61935* | ,17042 | ,000 | -2,1423 | -1,0965 |
|       |            |      | 1,00 | ,25990    | ,17042 | ,345 | -,2630  | ,7828   |
|       |            | 3,00 | 3,00 | -1,35946* | ,17042 | ,001 | -1,8824 | -,8366  |
|       |            |      | 1,00 | 1,61935*  | ,17042 | ,000 | 1,0965  | 2,1423  |
|       |            | 2,00 | 3,00 | 1,35946*  | ,17042 | ,001 | ,8366   | 1,8824  |
|       |            |      | 1,00 | -,25990   | ,17042 | ,178 | -,6769  | ,1571   |
|       |            | 2,00 | 3,00 | -1,61935* | ,17042 | ,000 | -2,0364 | -1,2023 |
|       |            |      | 1,00 | ,25990    | ,17042 | ,178 | -,1571  | ,6769   |
|       |            | 3,00 | 3,00 | -1,35946* | ,17042 | ,000 | -1,7765 | -,9425  |
|       |            |      | 1,00 | 1,61935*  | ,17042 | ,000 | 1,2023  | 2,0364  |
|       |            | 3,00 | 3,00 | 1,35946*  | ,17042 | ,000 | ,9425   | 1,7765  |
|       |            |      | 1,00 | -,25990   | ,17042 | ,534 | -,8201  | ,3004   |
| DAY12 | Bonferroni | 2,00 | 3,00 | -1,61935* | ,17042 | ,000 | -2,1796 | -1,0591 |
|       |            |      | 1,00 | ,25990    | ,17042 | ,534 | -,3004  | ,8201   |
|       |            | 3,00 | 3,00 | -1,35946* | ,17042 | ,001 | -1,9197 | -,7992  |
|       |            |      | 1,00 | 1,61935*  | ,17042 | ,000 | 1,0591  | 2,1796  |
|       |            | 3,00 | 3,00 | 1,35946*  | ,17042 | ,001 | ,7992   | 1,9197  |
|       |            |      | 1,00 | -,53978*  | ,10950 | ,006 | -,8758  | -,2038  |
|       |            | 2,00 | 3,00 | -1,19952* | ,10950 | ,000 | -1,5355 | -,8635  |
|       |            |      | 1,00 | ,53978*   | ,10950 | ,006 | ,2038   | ,8758   |
|       |            | 3,00 | 3,00 | -,65974*  | ,10950 | ,002 | -,9957  | -,3238  |
|       |            |      | 1,00 | 1,19952*  | ,10950 | ,000 | ,8635   | 1,5355  |
|       |            | 3,00 | 3,00 | ,65974*   | ,10950 | ,002 | ,3238   | ,9957   |
|       |            |      | 1,00 | -,53978*  | ,10950 | ,003 | -,8077  | -,2718  |
|       | LSD        | 2,00 | 3,00 | -1,19952* | ,10950 | ,000 | -1,4675 | -,9316  |
|       |            |      | 1,00 | ,53978*   | ,10950 | ,003 | ,2718   | ,8077   |
|       |            | 3,00 | 3,00 | -,65974*  | ,10950 | ,001 | -,9277  | -,3918  |
|       |            |      | 1,00 | 1,19952*  | ,10950 | ,000 | ,9316   | 1,4675  |
|       |            | 3,00 | 3,00 | ,65974*   | ,10950 | ,001 | ,3918   | ,9277   |
|       |            |      | 1,00 | -,53978*  | ,10950 | ,008 | -,8998  | -,1798  |
|       |            | 2,00 | 3,00 | -1,19952* | ,10950 | ,000 | -1,5595 | -,8395  |
|       |            |      | 1,00 | ,53978*   | ,10950 | ,008 | ,1798   | ,8998   |
|       |            | 3,00 | 3,00 | -,65974*  | ,10950 | ,003 | -1,0197 | -,2998  |
|       |            |      | 1,00 | 1,19952*  | ,10950 | ,000 | ,8395   | 1,5595  |
|       |            | 3,00 | 3,00 | ,65974*   | ,10950 | ,003 | ,2998   | 1,0197  |
|       |            |      | 1,00 | -,53978*  | ,10950 | ,008 | -,8998  | -,1798  |

\*. The mean difference is significant at the 0.05 level. TR: Packaging treatment, 1:LDPE, 2:LDPE-AC, 3:LDPE-AC-TO

**Table S6.** Pearson's correlation of heme iron with TBARS values of pork meat during storage within each packaging treatments

|      |                     | Correlations |      |      |      |      |       |       |
|------|---------------------|--------------|------|------|------|------|-------|-------|
|      |                     | DAY0         | DAY2 | DAY4 | DAY6 | DAY8 | DAY10 | DAY12 |
| DAY0 | Pearson Correlation | 1            | ,346 | ,326 | ,275 | ,198 | ,103  | -,269 |
|      | Sig. (2-tailed)     |              | ,160 | ,187 | ,269 | ,432 | ,685  | ,281  |
|      | N                   | 18           | 18   | 18   | 18   | 18   | 18    | 18    |

|       |                     |       |        |        |        |        |        |        |
|-------|---------------------|-------|--------|--------|--------|--------|--------|--------|
| DAY2  | Pearson Correlation | ,346  | 1      | ,998** | ,989** | ,969** | ,903** | ,719** |
|       | Sig. (2-tailed)     | ,160  |        | ,000   | ,000   | ,000   | ,000   | ,001   |
|       | N                   | 18    | 18     | 18     | 18     | 18     | 18     | 18     |
| DAY4  | Pearson Correlation | ,326  | ,998** | 1      | ,995** | ,980** | ,923** | ,749** |
|       | Sig. (2-tailed)     | ,187  | ,000   |        | ,000   | ,000   | ,000   | ,000   |
|       | N                   | 18    | 18     | 18     | 18     | 18     | 18     | 18     |
| DAY6  | Pearson Correlation | ,275  | ,989** | ,995** | 1      | ,991** | ,954** | ,794** |
|       | Sig. (2-tailed)     | ,269  | ,000   | ,000   |        | ,000   | ,000   | ,000   |
|       | N                   | 18    | 18     | 18     | 18     | 18     | 18     | 18     |
| DAY8  | Pearson Correlation | ,198  | ,969** | ,980** | ,991** | 1      | ,973** | ,846** |
|       | Sig. (2-tailed)     | ,432  | ,000   | ,000   | ,000   |        | ,000   | ,000   |
|       | N                   | 18    | 18     | 18     | 18     | 18     | 18     | 18     |
| DAY10 | Pearson Correlation | ,103  | ,903** | ,923** | ,954** | ,973** | 1      | ,902** |
|       | Sig. (2-tailed)     | ,685  | ,000   | ,000   | ,000   | ,000   |        | ,000   |
|       | N                   | 18    | 18     | 18     | 18     | 18     | 18     | 18     |
| DAY12 | Pearson Correlation | -,269 | ,719** | ,749** | ,794** | ,846** | ,902** | 1      |
|       | Sig. (2-tailed)     | ,281  | ,001   | ,000   | ,000   | ,000   | ,000   |        |
|       | N                   | 18    | 18     | 18     | 18     | 18     | 18     | 18     |

\*\* . Correlation is significant at the 0.01 level (2-tailed).

**Table S7.** ANOVA Results of TVC.

|      |                |             |           | ANOVA          |      |             |        |       |
|------|----------------|-------------|-----------|----------------|------|-------------|--------|-------|
|      |                |             |           | Sum of Squares | df   | Mean Square | F      | Sig.  |
| DAY0 | Between Groups | (Combined)  |           | ,000           | 2    | ,000        | ,000   | 1,000 |
|      |                | Linear Term | Contrast  | ,000           | 1    | ,000        | ,000   | 1,000 |
|      |                |             | Deviation | ,000           | 1    | ,000        | ,000   | 1,000 |
|      | Within Groups  |             | ,022      | 6              | ,004 |             |        |       |
|      | Total          |             | ,022      | 8              |      |             |        |       |
| DAY2 | Between Groups | (Combined)  |           | ,742           | 2    | ,371        | 8,914  | ,016  |
|      |                | Linear Term | Contrast  | ,735           | 1    | ,735        | 17,654 | ,006  |
|      |                |             | Deviation | ,007           | 1    | ,007        | ,173   | ,692  |
|      | Within Groups  |             | ,250      | 6              | ,042 |             |        |       |
|      | Total          |             | ,992      | 8              |      |             |        |       |
| DAY4 | Between Groups | (Combined)  |           | 2,251          | 2    | 1,126       | 35,032 | ,000  |
|      |                | Linear Term | Contrast  | 1,882          | 1    | 1,882       | 58,556 | ,000  |
|      |                |             | Deviation | ,370           | 1    | ,370        | 11,508 | ,015  |
|      | Within Groups  |             | ,193      | 6              | ,032 |             |        |       |
|      | Total          |             | 2,444     | 8              |      |             |        |       |
| DAY6 | Between Groups | (Combined)  |           | 2,382          | 2    | 1,191       | 11,935 | ,008  |
|      |                | Linear Term | Contrast  | 2,196          | 1    | 2,196       | 22,006 | ,003  |
|      |                |             | Deviation | ,186           | 1    | ,186        | 1,864  | ,221  |
|      | Within Groups  |             | ,599      | 6              | ,100 |             |        |       |
|      | Total          |             | 2,981     | 8              |      |             |        |       |
| DAY8 | Between Groups | (Combined)  |           | 1,680          | 2    | ,840        | 28,478 | ,001  |
|      |                | Linear Term | Contrast  | 1,622          | 1    | 1,622       | 54,997 | ,000  |
|      |                |             | Deviation | ,058           | 1    | ,058        | 1,959  | ,211  |
|      | Within Groups  |             | ,177      | 6              | ,030 |             |        |       |
|      | Total          |             | 1,857     | 8              |      |             |        |       |

\*\* 1 = LDPE, 2 = LDPE-AC, 3 = LDPE-AC-TO.

Table S8 Multiple Comparisons tests.

|                    |            | Multiple Comparisons |        |                 |            |       |                         |             |
|--------------------|------------|----------------------|--------|-----------------|------------|-------|-------------------------|-------------|
|                    |            |                      |        | Mean Difference |            |       | 95% Confidence Interval |             |
| Dependent Variable |            | (I) TO               | (J) TO | (I-J)           | Std. Error | Sig.  | Lower Bound             | Upper Bound |
| DAY0               | Tukey HSD  | 1,00                 | 2,00   | ,00000          | ,04899     | 1,000 | -,1503                  | ,1503       |
|                    |            |                      | 3,00   | ,00000          | ,04899     | 1,000 | -,1503                  | ,1503       |
|                    |            | 2,00                 | 1,00   | ,00000          | ,04899     | 1,000 | -,1503                  | ,1503       |
|                    |            |                      | 3,00   | ,00000          | ,04899     | 1,000 | -,1503                  | ,1503       |
|                    |            | 3,00                 | 1,00   | ,00000          | ,04899     | 1,000 | -,1503                  | ,1503       |
|                    |            |                      | 2,00   | ,00000          | ,04899     | 1,000 | -,1503                  | ,1503       |
|                    | LSD        | 1,00                 | 2,00   | ,00000          | ,04899     | 1,000 | -,1199                  | ,1199       |
|                    |            |                      | 3,00   | ,00000          | ,04899     | 1,000 | -,1199                  | ,1199       |
|                    |            | 2,00                 | 1,00   | ,00000          | ,04899     | 1,000 | -,1199                  | ,1199       |
|                    |            |                      | 3,00   | ,00000          | ,04899     | 1,000 | -,1199                  | ,1199       |
|                    |            | 3,00                 | 1,00   | ,00000          | ,04899     | 1,000 | -,1199                  | ,1199       |
|                    |            |                      | 2,00   | ,00000          | ,04899     | 1,000 | -,1199                  | ,1199       |
|                    | Bonferroni | 1,00                 | 2,00   | ,00000          | ,04899     | 1,000 | -,1611                  | ,1611       |
|                    |            |                      | 3,00   | ,00000          | ,04899     | 1,000 | -,1611                  | ,1611       |
|                    |            | 2,00                 | 1,00   | ,00000          | ,04899     | 1,000 | -,1611                  | ,1611       |
|                    |            |                      | 3,00   | ,00000          | ,04899     | 1,000 | -,1611                  | ,1611       |
|                    |            | 3,00                 | 1,00   | ,00000          | ,04899     | 1,000 | -,1611                  | ,1611       |
|                    |            |                      | 2,00   | ,00000          | ,04899     | 1,000 | -,1611                  | ,1611       |
| DAY2               | Tukey HSD  | 1,00                 | 2,00   | ,41000          | ,16660     | ,107  | -,1012                  | ,9212       |
|                    |            |                      | 3,00   | ,70000*         | ,16660     | ,013  | ,1888                   | 1,2112      |
|                    |            | 2,00                 | 1,00   | -,41000         | ,16660     | ,107  | -,9212                  | ,1012       |
|                    |            |                      | 3,00   | ,29000          | ,16660     | ,267  | -,2212                  | ,8012       |
|                    |            | 3,00                 | 1,00   | -,70000*        | ,16660     | ,013  | -1,2112                 | -,1888      |
|                    |            |                      | 2,00   | -,29000         | ,16660     | ,267  | -,8012                  | ,2212       |
|                    | LSD        | 1,00                 | 2,00   | ,41000*         | ,16660     | ,049  | ,0023                   | ,8177       |
|                    |            |                      | 3,00   | ,70000*         | ,16660     | ,006  | ,2923                   | 1,1077      |
|                    |            | 2,00                 | 1,00   | -,41000*        | ,16660     | ,049  | -,8177                  | -,0023      |
|                    |            |                      | 3,00   | ,29000          | ,16660     | ,132  | -,1177                  | ,6977       |
|                    |            | 3,00                 | 1,00   | -,70000*        | ,16660     | ,006  | -1,1077                 | -,2923      |
|                    |            |                      | 2,00   | -,29000         | ,16660     | ,132  | -,6977                  | ,1177       |
|                    | Bonferroni | 1,00                 | 2,00   | ,41000          | ,16660     | ,147  | -,1377                  | ,9577       |
|                    |            |                      | 3,00   | ,70000*         | ,16660     | ,017  | ,1523                   | 1,2477      |
|                    |            | 2,00                 | 1,00   | -,41000         | ,16660     | ,147  | -,9577                  | ,1377       |
|                    |            |                      | 3,00   | ,29000          | ,16660     | ,397  | -,2577                  | ,8377       |
|                    |            | 3,00                 | 1,00   | -,70000*        | ,16660     | ,017  | -1,2477                 | -,1523      |
|                    |            |                      | 2,00   | -,29000         | ,16660     | ,397  | -,8377                  | ,2577       |
| DAY4               | Tukey HSD  | 1,00                 | 2,00   | ,13000          | ,14636     | ,667  | -,3191                  | ,5791       |
|                    |            |                      | 3,00   | 1,12000*        | ,14636     | ,001  | ,6709                   | 1,5691      |
|                    |            | 2,00                 | 1,00   | -,13000         | ,14636     | ,667  | -,5791                  | ,3191       |

|      |            |      |      |           |        |       |         |        |
|------|------------|------|------|-----------|--------|-------|---------|--------|
|      | LSD        | 3,00 | 3,00 | ,99000*   | ,14636 | ,001  | ,5409   | 1,4391 |
|      |            |      | 1,00 | -1,12000* | ,14636 | ,001  | -1,5691 | -,6709 |
|      |            | 2,00 | 2,00 | -,99000*  | ,14636 | ,001  | -1,4391 | -,5409 |
|      |            |      | 1,00 | ,13000    | ,14636 | ,409  | -,2281  | ,4881  |
|      |            | 3,00 | 3,00 | 1,12000*  | ,14636 | ,000  | ,7619   | 1,4781 |
|      |            |      | 1,00 | -,13000   | ,14636 | ,409  | -,4881  | ,2281  |
|      |            | 3,00 | 3,00 | ,99000*   | ,14636 | ,001  | ,6319   | 1,3481 |
|      |            |      | 1,00 | -1,12000* | ,14636 | ,000  | -1,4781 | -,7619 |
|      |            | 2,00 | 2,00 | -,99000*  | ,14636 | ,001  | -1,3481 | -,6319 |
|      |            |      | 1,00 | ,13000    | ,14636 | 1,000 | -,3512  | ,6112  |
|      |            | 3,00 | 3,00 | 1,12000*  | ,14636 | ,001  | ,6388   | 1,6012 |
|      |            |      | 1,00 | -,13000   | ,14636 | 1,000 | -,6112  | ,3512  |
|      |            | 3,00 | 3,00 | ,99000*   | ,14636 | ,002  | ,5088   | 1,4712 |
|      |            |      | 1,00 | -1,12000* | ,14636 | ,001  | -1,6012 | -,6388 |
|      |            | 2,00 | 2,00 | -,99000*  | ,14636 | ,002  | -1,4712 | -,5088 |
| DAY6 | Tukey HSD  | 1,00 | 2,00 | ,30000    | ,25794 | ,515  | -,4914  | 1,0914 |
|      |            |      | 3,00 | 1,21000*  | ,25794 | ,008  | ,4186   | 2,0014 |
|      |            | 2,00 | 1,00 | -,30000   | ,25794 | ,515  | -1,0914 | ,4914  |
|      |            |      | 3,00 | ,91000*   | ,25794 | ,029  | ,1186   | 1,7014 |
|      |            | 3,00 | 1,00 | -1,21000* | ,25794 | ,008  | -2,0014 | -,4186 |
|      |            |      | 2,00 | -,91000*  | ,25794 | ,029  | -1,7014 | -,1186 |
|      | LSD        | 1,00 | 2,00 | ,30000    | ,25794 | ,289  | -,3312  | ,9312  |
|      |            |      | 3,00 | 1,21000*  | ,25794 | ,003  | ,5788   | 1,8412 |
|      |            | 2,00 | 1,00 | -,30000   | ,25794 | ,289  | -,9312  | ,3312  |
|      |            |      | 3,00 | ,91000*   | ,25794 | ,012  | ,2788   | 1,5412 |
|      |            | 3,00 | 1,00 | -1,21000* | ,25794 | ,003  | -1,8412 | -,5788 |
|      |            |      | 2,00 | -,91000*  | ,25794 | ,012  | -1,5412 | -,2788 |
|      | Bonferroni | 1,00 | 2,00 | ,30000    | ,25794 | ,867  | -,5480  | 1,1480 |
|      |            |      | 3,00 | 1,21000*  | ,25794 | ,010  | ,3620   | 2,0580 |
|      |            | 2,00 | 1,00 | -,30000   | ,25794 | ,867  | -1,1480 | ,5480  |
|      |            |      | 3,00 | ,91000*   | ,25794 | ,037  | ,0620   | 1,7580 |
|      |            | 3,00 | 1,00 | -1,21000* | ,25794 | ,010  | -2,0580 | -,3620 |
|      |            |      | 2,00 | -,91000*  | ,25794 | ,037  | -1,7580 | -,0620 |
| DAY8 | Tukey HSD  | 1,00 | 2,00 | ,35000    | ,14024 | ,103  | -,0803  | ,7803  |
|      |            |      | 3,00 | 1,04000*  | ,14024 | ,001  | ,6097   | 1,4703 |
|      |            | 2,00 | 1,00 | -,35000   | ,14024 | ,103  | -,7803  | ,0803  |
|      |            |      | 3,00 | ,69000*   | ,14024 | ,006  | ,2597   | 1,1203 |
|      |            | 3,00 | 1,00 | -1,04000* | ,14024 | ,001  | -1,4703 | -,6097 |
|      |            |      | 2,00 | -,69000*  | ,14024 | ,006  | -1,1203 | -,2597 |
|      | LSD        | 1,00 | 2,00 | ,35000*   | ,14024 | ,047  | ,0069   | ,6931  |
|      |            |      | 3,00 | 1,04000*  | ,14024 | ,000  | ,6969   | 1,3831 |
|      |            | 2,00 | 1,00 | -,35000*  | ,14024 | ,047  | -,6931  | -,0069 |
|      |            |      | 3,00 | ,69000*   | ,14024 | ,003  | ,3469   | 1,0331 |
|      |            | 3,00 | 1,00 | -1,04000* | ,14024 | ,000  | -1,3831 | -,6969 |
|      |            |      | 2,00 | -,69000*  | ,14024 | ,003  | -1,0331 | -,3469 |

|            |      |      |           |        |      |         |        |
|------------|------|------|-----------|--------|------|---------|--------|
| Bonferroni | 1,00 | 2,00 | ,35000    | ,14024 | ,140 | -,1110  | ,8110  |
|            |      | 3,00 | 1,04000*  | ,14024 | ,001 | ,5790   | 1,5010 |
|            | 2,00 | 1,00 | -,35000   | ,14024 | ,140 | -,8110  | ,1110  |
|            |      | 3,00 | ,69000*   | ,14024 | ,008 | ,2290   | 1,1510 |
|            | 3,00 | 1,00 | -1,04000* | ,14024 | ,001 | -1,5010 | -,5790 |
|            |      | 2,00 | -,69000*  | ,14024 | ,008 | -1,1510 | -,2290 |

\*. The mean difference is significant at the 0.05 level. \*\* 1 = LDPE, 2 = LDPE/15AC, 3 = LDPE/15TO@AC.

**Table S9. ANOVA ODOR**

### Multiple Comparisons

| Dependent Variable |            | (I) TO | (J) TO | Mean Difference<br>(I-J) | Std. Error | Sig.  | 95% Confidence Interval |             |
|--------------------|------------|--------|--------|--------------------------|------------|-------|-------------------------|-------------|
|                    |            |        |        |                          |            |       | Lower Bound             | Upper Bound |
| DAY2               | Tukey HSD  | 1,00   | 2,00   | ,00000                   | ,17243     | 1,000 | -,4600                  | ,4600       |
|                    |            |        | 3,00   | -,16000                  | ,17243     | ,634  | -,6200                  | ,3000       |
|                    |            | 2,00   | 1,00   | ,00000                   | ,17243     | 1,000 | -,4600                  | ,4600       |
|                    |            |        | 3,00   | -,16000                  | ,17243     | ,634  | -,6200                  | ,3000       |
|                    |            | 3,00   | 1,00   | ,16000                   | ,17243     | ,634  | -,3000                  | ,6200       |
|                    |            |        | 2,00   | ,16000                   | ,17243     | ,634  | -,3000                  | ,6200       |
|                    | LSD        | 1,00   | 2,00   | ,00000                   | ,17243     | 1,000 | -,3757                  | ,3757       |
|                    |            |        | 3,00   | -,16000                  | ,17243     | ,372  | -,5357                  | ,2157       |
|                    |            | 2,00   | 1,00   | ,00000                   | ,17243     | 1,000 | -,3757                  | ,3757       |
|                    |            |        | 3,00   | -,16000                  | ,17243     | ,372  | -,5357                  | ,2157       |
|                    |            | 3,00   | 1,00   | ,16000                   | ,17243     | ,372  | -,2157                  | ,5357       |
|                    |            |        | 2,00   | ,16000                   | ,17243     | ,372  | -,2157                  | ,5357       |
|                    | Bonferroni | 1,00   | 2,00   | ,00000                   | ,17243     | 1,000 | -,4793                  | ,4793       |
|                    |            |        | 3,00   | -,16000                  | ,17243     | 1,000 | -,6393                  | ,3193       |
|                    |            | 2,00   | 1,00   | ,00000                   | ,17243     | 1,000 | -,4793                  | ,4793       |
|                    |            |        | 3,00   | -,16000                  | ,17243     | 1,000 | -,6393                  | ,3193       |
|                    |            | 3,00   | 1,00   | ,16000                   | ,17243     | 1,000 | -,3193                  | ,6393       |
|                    |            |        | 2,00   | ,16000                   | ,17243     | 1,000 | -,3193                  | ,6393       |

|      |            |      |      |          |        |       |         |        |
|------|------------|------|------|----------|--------|-------|---------|--------|
| DAY4 | Tukey HSD  | 1,00 | 2,00 | ,00000   | ,27105 | 1,000 | -,7231  | ,7231  |
|      |            |      | 3,00 | -,34000  | ,27105 | ,446  | -1,0631 | ,3831  |
|      |            | 2,00 | 1,00 | ,00000   | ,27105 | 1,000 | -,7231  | ,7231  |
|      |            |      | 3,00 | -,34000  | ,27105 | ,446  | -1,0631 | ,3831  |
|      |            | 3,00 | 1,00 | ,34000   | ,27105 | ,446  | -,3831  | 1,0631 |
|      |            |      | 2,00 | ,34000   | ,27105 | ,446  | -,3831  | 1,0631 |
|      | LSD        | 1,00 | 2,00 | ,00000   | ,27105 | 1,000 | -,5906  | ,5906  |
|      |            |      | 3,00 | -,34000  | ,27105 | ,234  | -,9306  | ,2506  |
|      |            | 2,00 | 1,00 | ,00000   | ,27105 | 1,000 | -,5906  | ,5906  |
|      |            |      | 3,00 | -,34000  | ,27105 | ,234  | -,9306  | ,2506  |
|      |            | 3,00 | 1,00 | ,34000   | ,27105 | ,234  | -,2506  | ,9306  |
|      |            |      | 2,00 | ,34000   | ,27105 | ,234  | -,2506  | ,9306  |
|      | Bonferroni | 1,00 | 2,00 | ,00000   | ,27105 | 1,000 | -,7534  | ,7534  |
|      |            |      | 3,00 | -,34000  | ,27105 | ,701  | -1,0934 | ,4134  |
|      |            | 2,00 | 1,00 | ,00000   | ,27105 | 1,000 | -,7534  | ,7534  |
|      |            |      | 3,00 | -,34000  | ,27105 | ,701  | -1,0934 | ,4134  |
|      |            | 3,00 | 1,00 | ,34000   | ,27105 | ,701  | -,4134  | 1,0934 |
|      |            |      | 2,00 | ,34000   | ,27105 | ,701  | -,4134  | 1,0934 |
| DAY6 | Tukey HSD  | 1,00 | 2,00 | -,22000  | ,16411 | ,401  | -,6578  | ,2178  |
|      |            |      | 3,00 | -,70000* | ,16411 | ,003  | -1,1378 | -,2622 |
|      |            | 2,00 | 1,00 | ,22000   | ,16411 | ,401  | -,2178  | ,6578  |
|      |            |      | 3,00 | -,48000* | ,16411 | ,032  | -,9178  | -,0422 |
|      |            | 3,00 | 1,00 | ,70000*  | ,16411 | ,003  | ,2622   | 1,1378 |
|      |            |      | 2,00 | ,48000*  | ,16411 | ,032  | ,0422   | ,9178  |
|      | LSD        | 1,00 | 2,00 | -,22000  | ,16411 | ,205  | -,5776  | ,1376  |
|      |            |      | 3,00 | -,70000* | ,16411 | ,001  | -1,0576 | -,3424 |
|      |            | 2,00 | 1,00 | ,22000   | ,16411 | ,205  | -,1376  | ,5776  |
|      |            |      | 3,00 | -,48000* | ,16411 | ,013  | -,8376  | -,1224 |
|      |            | 3,00 | 1,00 | ,70000*  | ,16411 | ,001  | ,3424   | 1,0576 |
|      |            |      | 2,00 | ,48000*  | ,16411 | ,013  | ,1224   | ,8376  |



|            |      |      |          |        |      |         |        |
|------------|------|------|----------|--------|------|---------|--------|
| Bonferroni | 1,00 | 2,00 | -,22000  | ,16411 | ,615 | -,6761  | ,2361  |
|            |      | 3,00 | -,70000* | ,16411 | ,003 | -1,1561 | -,2439 |
|            | 2,00 | 1,00 | ,22000   | ,16411 | ,615 | -,2361  | ,6761  |
|            |      | 3,00 | -,48000* | ,16411 | ,038 | -,9361  | -,0239 |
|            | 3,00 | 1,00 | ,70000*  | ,16411 | ,003 | ,2439   | 1,1561 |
|            |      | 2,00 | ,48000*  | ,16411 | ,038 | ,0239   | ,9361  |

\*. The mean difference is significant at the 0.05 level.

**Table S10.** ANOVA COLOR

| Multiple Comparisons |            |        |        |                 |            |       |                         |             |
|----------------------|------------|--------|--------|-----------------|------------|-------|-------------------------|-------------|
| Dependent Variable   |            | (I) TO | (J) TO | Mean Difference | Std. Error | Sig.  | 95% Confidence Interval |             |
|                      |            |        |        | (I-J)           |            |       | Lower Bound             | Upper Bound |
| DAY2                 | Tukey HSD  | 1,00   | 2,00   | ,26000          | ,21479     | ,470  | -,3130                  | ,8330       |
|                      |            |        | 3,00   | ,00000          | ,21479     | 1,000 | -,5730                  | ,5730       |
|                      |            | 2,00   | 1,00   | -,26000         | ,21479     | ,470  | -,8330                  | ,3130       |
|                      |            |        | 3,00   | -,26000         | ,21479     | ,470  | -,8330                  | ,3130       |
|                      |            | 3,00   | 1,00   | ,00000          | ,21479     | 1,000 | -,5730                  | ,5730       |
|                      |            |        | 2,00   | ,26000          | ,21479     | ,470  | -,3130                  | ,8330       |
|                      | LSD        | 1,00   | 2,00   | ,26000          | ,21479     | ,249  | -,2080                  | ,7280       |
|                      |            |        | 3,00   | ,00000          | ,21479     | 1,000 | -,4680                  | ,4680       |
|                      |            | 2,00   | 1,00   | -,26000         | ,21479     | ,249  | -,7280                  | ,2080       |
|                      |            |        | 3,00   | -,26000         | ,21479     | ,249  | -,7280                  | ,2080       |
|                      |            | 3,00   | 1,00   | ,00000          | ,21479     | 1,000 | -,4680                  | ,4680       |
|                      |            |        | 2,00   | ,26000          | ,21479     | ,249  | -,2080                  | ,7280       |
|                      | Bonferroni | 1,00   | 2,00   | ,26000          | ,21479     | ,748  | -,3370                  | ,8570       |
|                      |            |        | 3,00   | ,00000          | ,21479     | 1,000 | -,5970                  | ,5970       |
|                      |            | 2,00   | 1,00   | -,26000         | ,21479     | ,748  | -,8570                  | ,3370       |

|      |            |      |      |           |        |       |         |        |
|------|------------|------|------|-----------|--------|-------|---------|--------|
|      |            |      | 3,00 | -,26000   | ,21479 | ,748  | -,8570  | ,3370  |
|      |            | 3,00 | 1,00 | ,00000    | ,21479 | 1,000 | -,5970  | ,5970  |
|      |            |      | 2,00 | ,26000    | ,21479 | ,748  | -,3370  | ,8570  |
| DAY4 | Tukey HSD  | 1,00 | 2,00 | ,08000    | ,31027 | ,964  | -,7478  | ,9078  |
|      |            |      | 3,00 | -,22000   | ,31027 | ,763  | -1,0478 | ,6078  |
|      |            | 2,00 | 1,00 | -,08000   | ,31027 | ,964  | -,9078  | ,7478  |
|      |            |      | 3,00 | -,30000   | ,31027 | ,610  | -1,1278 | ,5278  |
|      |            | 3,00 | 1,00 | ,22000    | ,31027 | ,763  | -,6078  | 1,0478 |
|      |            |      | 2,00 | ,30000    | ,31027 | ,610  | -,5278  | 1,1278 |
|      | LSD        | 1,00 | 2,00 | ,08000    | ,31027 | ,801  | -,5960  | ,7560  |
|      |            |      | 3,00 | -,22000   | ,31027 | ,492  | -,8960  | ,4560  |
|      |            | 2,00 | 1,00 | -,08000   | ,31027 | ,801  | -,7560  | ,5960  |
|      |            |      | 3,00 | -,30000   | ,31027 | ,353  | -,9760  | ,3760  |
|      |            | 3,00 | 1,00 | ,22000    | ,31027 | ,492  | -,4560  | ,8960  |
|      |            |      | 2,00 | ,30000    | ,31027 | ,353  | -,3760  | ,9760  |
|      | Bonferroni | 1,00 | 2,00 | ,08000    | ,31027 | 1,000 | -,7824  | ,9424  |
|      |            |      | 3,00 | -,22000   | ,31027 | 1,000 | -1,0824 | ,6424  |
|      |            | 2,00 | 1,00 | -,08000   | ,31027 | 1,000 | -,9424  | ,7824  |
|      |            |      | 3,00 | -,30000   | ,31027 | 1,000 | -1,1624 | ,5624  |
|      |            | 3,00 | 1,00 | ,22000    | ,31027 | 1,000 | -,6424  | 1,0824 |
|      |            |      | 2,00 | ,30000    | ,31027 | 1,000 | -,5624  | 1,1624 |
| DAY6 | Tukey HSD  | 1,00 | 2,00 | -,24000   | ,10646 | ,102  | -,5240  | ,0440  |
|      |            |      | 3,00 | -1,06000* | ,10646 | ,000  | -1,3440 | -,7760 |
|      |            | 2,00 | 1,00 | ,24000    | ,10646 | ,102  | -,0440  | ,5240  |
|      |            |      | 3,00 | -,82000*  | ,10646 | ,000  | -1,1040 | -,5360 |
|      |            | 3,00 | 1,00 | 1,06000*  | ,10646 | ,000  | ,7760   | 1,3440 |
|      |            |      | 2,00 | ,82000*   | ,10646 | ,000  | ,5360   | 1,1040 |
|      | LSD        | 1,00 | 2,00 | -,24000*  | ,10646 | ,044  | -,4720  | -,0080 |
|      |            |      | 3,00 | -1,06000* | ,10646 | ,000  | -1,2920 | -,8280 |
|      |            | 2,00 | 1,00 | ,24000*   | ,10646 | ,044  | ,0080   | ,4720  |

|            |      |      |           |        |      |         |        |
|------------|------|------|-----------|--------|------|---------|--------|
| Bonferroni | 3,00 |      | -,82000*  | ,10646 | ,000 | -1,0520 | -,5880 |
|            |      | 1,00 | 1,06000*  | ,10646 | ,000 | ,8280   | 1,2920 |
|            |      | 2,00 | ,82000*   | ,10646 | ,000 | ,5880   | 1,0520 |
|            | 1,00 | 2,00 | -,24000   | ,10646 | ,131 | -,5359  | ,0559  |
|            | 2,00 | 3,00 | -1,06000* | ,10646 | ,000 | -1,3559 | -,7641 |
|            |      | 1,00 | ,24000    | ,10646 | ,131 | -,0559  | ,5359  |
|            |      | 3,00 | -,82000*  | ,10646 | ,000 | -1,1159 | -,5241 |
|            | 3,00 | 1,00 | 1,06000*  | ,10646 | ,000 | ,7641   | 1,3559 |
|            | 2,00 | 3,00 | ,82000*   | ,10646 | ,000 | ,5241   | 1,1159 |

\*. The mean difference is significant at the 0.05 level.

**Table S11.** ANOVA COHESION

### Multiple Comparisons

| Dependent Variable |            | (I) TO | (J) TO | Mean Difference | Std. Error | Sig.  | 95% Confidence Interval |             |
|--------------------|------------|--------|--------|-----------------|------------|-------|-------------------------|-------------|
|                    |            |        |        | (I-J)           |            |       | Lower Bound             | Upper Bound |
| DAY2               | Tukey HSD  | 1,00   | 2,00   | ,10000          | ,20559     | ,879  | -,4485                  | ,6485       |
|                    |            |        | 3,00   | ,02000          | ,20559     | ,995  | -,5285                  | ,5685       |
|                    |            | 2,00   | 1,00   | -,10000         | ,20559     | ,879  | -,6485                  | ,4485       |
|                    |            |        | 3,00   | -,08000         | ,20559     | ,920  | -,6285                  | ,4685       |
|                    |            | 3,00   | 1,00   | -,02000         | ,20559     | ,995  | -,5685                  | ,5285       |
|                    |            |        | 2,00   | ,08000          | ,20559     | ,920  | -,4685                  | ,6285       |
|                    | LSD        | 1,00   | 2,00   | ,10000          | ,20559     | ,635  | -,3479                  | ,5479       |
|                    |            |        | 3,00   | ,02000          | ,20559     | ,924  | -,4279                  | ,4679       |
|                    |            | 2,00   | 1,00   | -,10000         | ,20559     | ,635  | -,5479                  | ,3479       |
|                    |            |        | 3,00   | -,08000         | ,20559     | ,704  | -,5279                  | ,3679       |
|                    |            | 3,00   | 1,00   | -,02000         | ,20559     | ,924  | -,4679                  | ,4279       |
|                    |            |        | 2,00   | ,08000          | ,20559     | ,704  | -,3679                  | ,5279       |
|                    | Bonferroni | 1,00   | 2,00   | ,10000          | ,20559     | 1,000 | -,4714                  | ,6714       |

|      |            |      |      |           |        |       |         |        |
|------|------------|------|------|-----------|--------|-------|---------|--------|
|      |            |      | 3,00 | ,02000    | ,20559 | 1,000 | -,5514  | ,5914  |
|      |            | 2,00 | 1,00 | -,10000   | ,20559 | 1,000 | -,6714  | ,4714  |
|      |            |      | 3,00 | -,08000   | ,20559 | 1,000 | -,6514  | ,4914  |
|      |            | 3,00 | 1,00 | -,02000   | ,20559 | 1,000 | -,5914  | ,5514  |
|      |            |      | 2,00 | ,08000    | ,20559 | 1,000 | -,4914  | ,6514  |
| DAY4 | Tukey HSD  | 1,00 | 2,00 | -,34000   | ,26633 | ,434  | -1,0505 | ,3705  |
|      |            |      | 3,00 | -,48000   | ,26633 | ,210  | -1,1905 | ,2305  |
|      |            | 2,00 | 1,00 | ,34000    | ,26633 | ,434  | -,3705  | 1,0505 |
|      |            |      | 3,00 | -,14000   | ,26633 | ,860  | -,8505  | ,5705  |
|      |            | 3,00 | 1,00 | ,48000    | ,26633 | ,210  | -,2305  | 1,1905 |
|      |            |      | 2,00 | ,14000    | ,26633 | ,860  | -,5705  | ,8505  |
|      | LSD        | 1,00 | 2,00 | -,34000   | ,26633 | ,226  | -,9203  | ,2403  |
|      |            |      | 3,00 | -,48000   | ,26633 | ,097  | -1,0603 | ,1003  |
|      |            | 2,00 | 1,00 | ,34000    | ,26633 | ,226  | -,2403  | ,9203  |
|      |            |      | 3,00 | -,14000   | ,26633 | ,609  | -,7203  | ,4403  |
|      |            | 3,00 | 1,00 | ,48000    | ,26633 | ,097  | -,1003  | 1,0603 |
|      |            |      | 2,00 | ,14000    | ,26633 | ,609  | -,4403  | ,7203  |
|      | Bonferroni | 1,00 | 2,00 | -,34000   | ,26633 | ,678  | -1,0803 | ,4003  |
|      |            |      | 3,00 | -,48000   | ,26633 | ,290  | -1,2203 | ,2603  |
|      |            | 2,00 | 1,00 | ,34000    | ,26633 | ,678  | -,4003  | 1,0803 |
|      |            |      | 3,00 | -,14000   | ,26633 | 1,000 | -,8803  | ,6003  |
|      |            | 3,00 | 1,00 | ,48000    | ,26633 | ,290  | -,2603  | 1,2203 |
|      |            |      | 2,00 | ,14000    | ,26633 | 1,000 | -,6003  | ,8803  |
| DAY6 | Tukey HSD  | 1,00 | 2,00 | -,60000*  | ,13614 | ,002  | -,9632  | -,2368 |
|      |            |      | 3,00 | -1,10000* | ,13614 | ,000  | -1,4632 | -,7368 |
|      |            | 2,00 | 1,00 | ,60000*   | ,13614 | ,002  | ,2368   | ,9632  |
|      |            |      | 3,00 | -,50000*  | ,13614 | ,008  | -,8632  | -,1368 |
|      |            | 3,00 | 1,00 | 1,10000*  | ,13614 | ,000  | ,7368   | 1,4632 |
|      |            |      | 2,00 | ,50000*   | ,13614 | ,008  | ,1368   | ,8632  |
|      | LSD        | 1,00 | 2,00 | -,60000*  | ,13614 | ,001  | -,8966  | -,3034 |

|            |      |      |           |        |      |         |        |
|------------|------|------|-----------|--------|------|---------|--------|
| Bonferroni | 3,00 |      | -1,10000* | ,13614 | ,000 | -1,3966 | -,8034 |
|            |      | 2,00 | ,60000*   | ,13614 | ,001 | ,3034   | ,8966  |
|            |      | 3,00 | -,50000*  | ,13614 | ,003 | -,7966  | -,2034 |
|            |      | 3,00 | 1,10000*  | ,13614 | ,000 | ,8034   | 1,3966 |
|            |      | 2,00 | ,50000*   | ,13614 | ,003 | ,2034   | ,7966  |
|            | 1,00 | 2,00 | -,60000*  | ,13614 | ,003 | -,9784  | -,2216 |
|            |      | 3,00 | -1,10000* | ,13614 | ,000 | -1,4784 | -,7216 |
|            |      | 2,00 | ,60000*   | ,13614 | ,003 | ,2216   | ,9784  |
|            |      | 3,00 | -,50000*  | ,13614 | ,010 | -,8784  | -,1216 |
|            |      | 3,00 | 1,10000*  | ,13614 | ,000 | ,7216   | 1,4784 |
|            |      | 2,00 | ,50000*   | ,13614 | ,010 | ,1216   | ,8784  |

\*. The mean difference is significant at the 0.05 level.

1,00: LDPE

2,00: LDPE/15AC

3,00: LDPE/15TO@AC
